1 ***De novo* assembly and annotation of the larval transcriptome of two spadefoot toads widely**  
2 **divergent in developmental rate**

3

4

5

6 H. Christoph Liedtke<sup>1</sup>, Jèssica Gómez Garrido<sup>2</sup>, Marta Gut<sup>2,3</sup>, Anna Esteve-Codina<sup>2</sup>, Tyler Alioto<sup>2,3</sup>

7 and Ivan Gomez-Mestre<sup>1\*</sup>

8

9

10 1. Ecology, Evolution and Development Group, Doñana Biological Station (CSIC), Seville E41092,  
11 Spain

12 2. CNAG-CRG, Centre for Genomic Regulation (CRG), The Barcelona Institute of Science and  
13 Technology, Baldiri Reixac 4, Barcelona 08028, Spain

14 3. Universitat Pompeu Fabra (UPF), Barcelona, Spain

15

16 \*Correspondence should be addressed to: [igmestre@ebd.csic.es](mailto:igmestre@ebd.csic.es)

17

17

## 18 **Introduction**

19

20 Most amphibian species exhibit a complex life-cycle including two or more life stages separated by  
21 an ontogenetic switch point such as hatching or metamorphosis. Adaptations to divergent  
22 environments can require the modification of the timing of such switch points and the relative  
23 investment in growth and differentiation between subsequent stages [1]. Such alterations of  
24 developmental trajectories, however, often have substantial repercussions at several organismal  
25 levels, from physiology to morphology and even genomic structure. Adaptive divergence in  
26 developmental rate tracking aquatic habitats of different duration in spadefoot toads is a well-known  
27 example of this. Spadefoot toads from Europe and northern Africa typically have tadpoles that grow  
28 to be quite large over a long larval period, but can otherwise accelerate development and precipitate  
29 metamorphosis if at risk of pond drying, whereas north American spadefoot toads tend to have  
30 smaller tadpoles that develop faster and are less capable of further developmental acceleration [2]. At  
31 each end of this spectrum we find *Pelobates cultripes*, distributed throughout most of the Iberian  
32 Peninsula and southern France, and *Scaphiopus couchii*, distributed across southwestern USA to  
33 northern Mexico. *Pelobates cultripes* larvae grow quite large (up to > 16 g) and can take up to 6  
34 months to reach metamorphosis, whereas *S. couchii*'s tadpoles are much smaller (1.5-2 g) and can  
35 develop to metamorphosis in as little as 8 days. Such developmental acceleration is rather  
36 energetically demanding and requires a substantial increase in metabolic activity [3], hence incurring  
37 in oxidative stress [4]. Precipitating metamorphosis alters growth and developmental trajectories  
38 non-isometrically for different parts of the body, causing metamorphs to not only be smaller but also  
39 to have relatively shorter limbs [5-7]. Developmental acceleration is achieved through  
40 neuroendocrine regulation mainly resulting in increased corticosterone and thyroid hormone levels  
41 [3,8], as well as through differential expression of hormone receptors [4]. Interestingly, the canalized

42 fast development of *S. couchii* to a large extent mirrors the environmentally-induced accelerated  
43 state of the more plastic *P. cultripes* [3].

44 At the genomic level, evolutionary divergences in developmental rate seem to leave a big  
45 imprint on whole genomes with some studies showing that fast developmental rates are often  
46 associated with smaller genome sizes [9,10]. The rule also holds true for amphibians, whether at a  
47 large macroevolutionary scale (Liedtke et al. *in press*) or focused on specific species groups [11].  
48 Spadefoot toads present broad differences in developmental rate across species, which are  
49 consequently also reflected in large differences in genome size [12]: slow developing *Pelobates*  
50 *cultripes* has a large genome (~3.9 Gbp), whereas fast developing *S. couchii* has only about one third  
51 its size (~1.5 Gbp). Here we present a first description of the transcriptomes of these species at the  
52 onset of metamorphosis to explore the potential consequences of such dramatic divergence in their  
53 genomes and to uncover the transcriptomic basis of their differences in developmental rate.

54 The NCBI Transcriptome Shotgun assemblies database currently lists transcriptome assemblies  
55 for 26 species of amphibians and of those, only four are larval phase transcriptomes: *Rhinella*  
56 *marina* [13], *Microhyla fissipes* [14], *Lithobates catesbeiana* and *Xenopus laevis* [15]. The addition  
57 of transcriptomes for the larval phases of two more species, especially as they represent a distinct  
58 evolutionary lineage, is therefore a significant contribution to the current knowledgebase.

59

## 60 **Methods**

61

### 62 ***Sample collection, total RNA extraction and sequencing***

63 Three egg clutches of *P. cultripes* were collected from a natural pond in Doñana National Park,  
64 southwestern Spain, brought to a walk-in chamber in the laboratories of Doñana Biological Station  
65 (EBD-CSIC) and placed in a plastic tray with carbon-filtered dechlorinated tap water with aerators to  
66 ensure adequate oxygenation. Another three clutches of *Scaphiopus couchii* were obtained from

67 adult pairs kept in the laboratory at EBD-CSIC. Adults were hormonally stimulated to breed by  
68 intraperitoneally injecting 20–100  $\mu$ L of 1  $\mu$ g/100  $\mu$ L GnRH agonist (des-Gly, [D-His(Bzl)]-  
69 luteinizing hormone releasing hormone ethylamide, Sigma). Upon hatching, we transferred tadpoles  
70 from each clutch of each species to 3 L plastic containers with dechlorinated tap water where they  
71 were individually kept under standard conditions of 24 °C, 12:12 L:D photoperiod, *ad libitum* food  
72 supply consisting of finely powdered rabbit chow. As tadpoles reached Gosner stage 35 in their  
73 development [16], we euthanized twelve individuals per species via MS-222 overdose, eviscerated  
74 them to avoid interferences from faecal material, and snap-froze them in liquid nitrogen. We  
75 extracted whole-body total RNA from each tadpoles using Trizol reagent following the  
76 manufacturer's protocol (Invitrogen). Total RNA was assayed for quantity and quality using Qubit®  
77 RNA HS Assay (Life Technologies) and RNA 6000 Nano Assay on a Bioanalyzer 2100.

78 The RNASeq libraries were prepared from total RNA using the TruSeq®Stranded mRNA LT  
79 Sample Prep Kit (Illumina Inc., Rev.E, October 2013). Briefly, 500ng of total RNA was used as the  
80 input material and was enriched for the mRNA fraction using oligo-dT magnetic beads. The mRNA  
81 was fragmented in the presence of divalent metal cations. The second strand cDNA synthesis was  
82 performed in the presence of dUTP instead of dTTP, this allowed to achieve the strand specificity.  
83 The blunt-ended double stranded cDNA was 3'adenylated and Illumina indexed adapters were  
84 ligated. The ligation product was enriched with 15 PCR cycles and the final library was validated on  
85 an Agilent 2100 Bioanalyzer with the DNA 7500 assay.

86 Each library was sequenced using TruSeq SBS Kit v3-HS, in paired end mode with the read  
87 length 2x76bp. We generated on average 38 million paired-end reads for each sample in a fraction of  
88 a sequencing lane on HiSeq2000 (Illumina) following the manufacturer's protocol. Images analysis,  
89 base calling and quality scoring of the run were processed using the manufacturer's software Real  
90 Time Analysis (RTA 1.13.48) and followed by generation of FASTQ sequence files by CASAVA  
91 1.8.

92

### 93 ***Assembling de novo transcriptomes of P. cultripes and S. couchii***

94 Quality of raw reads was inspected using FASTQC

95 (<https://www.bioinformatics.babraham.ac.uk/projects/fastqc/>) and MULTIQC [17]. Assembly was

96 performed using Trinity v2.4.0 [18] for the two species separately. Reads from all samples per

97 species were combined, trimmed (using default Trimmomatic settings SLIDINGWINDOW:4:5

98 LEADING:5 TRAILING:5 MINLEN:25)[19] and normalized using *in silico* normalization with

99 default Trinity settings (flags used: --trimmomatic --normalize\_max\_read\_cov 50).

100

### 101 ***Assessment of transcriptome quality and completeness***

102 Transcriptome quality in terms of read representation was evaluated by mapping the normalized

103 reads (pairs only) back onto the transcriptome using Bowtie2 v2.3.2 [20]. Completeness in terms of

104 gene content was assessed using BUSCO v3.0.2 [21] with the tetrapoda-odb9 database as a reference

105 as well as by running blastx (E-value cut off  $E \leq 1e^{-20}$ ) against both the SwissProt database

106 (downloaded on 01.11.2017) and the *Xenopus tropicalis* proteome (Ensemble JGI 4.2; downloaded

107 on 03.11.2017) with a stringent Evalue criteria of  $\leq 1e^{-20}$ . The count of full-length transcripts with

108 blastx hits was based on grouped high scoring segment pairs per transcript to avoid multiple

109 fragments per transcript aligning to a single protein sequence.

110

### 111 ***Functional annotation***

112 We used Trinotate v3.0 (<https://trinotate.github.io/>) to annotate the transcriptome. This involves

113 finding similarities to known proteins by querying transcripts against the Swissprot database

114 (accessed in June 2018) [22] (blastx with a cut-off of  $E \leq 1e^{-5}$ ). Moreover, likely coding regions were

115 detected with TransDecoder (<https://github.com/TransDecoder>) and resulting protein products

116 (coding sequence; CDS) were matched against both the complete Swissprot database and a subset

117 including only vertebrate genes, using blastp ( $Evalue \leq 1e^{-5}$ ), and a conserved protein domain search  
118 was conducted using Hmmer (<http://hmmer.org/>) on the Pfam database [23]. SignalP v4.1 [24] and  
119 TmHMM v2.0 (<http://www.cbs.dtu.dk/services/TMHMM/>) were used to predict signal peptides and  
120 transmembrane regions respectively. Finally, gene ontology identifiers were assigned to transcripts  
121 based on available annotations from best-matching Swissprot entries. Trinotate also provides KEGG  
122 (Kyoto Encyclopedia of Genes and Genomes; <http://www.genome.jp/kegg/>) and EggNOG [25]  
123 annotations. Exploring the Trinotate output was facilitated using the TrinotateR R package  
124 (<https://github.com/cstubben/trinotateR>).

125 The PANTHER classification scheme [26] for *Xenopus tropicalis* was used to organize gene  
126 function and ontology using the *Xenopus* Ensembl protein identifiers recovered for the quality  
127 assessment step above. Using the PANTHER web server, we performed both functional  
128 classifications and a statistical overrepresentation test (with default settings), to investigate which  
129 genes are significantly ( $p < 0.05$ ) over or under represented in our transcriptomes compared to the *X.*  
130 *tropicalis* reference.

131

### 132 ***Orthologous genes***

133 Orthofinder v2.2.3 [27] was used to find orthologous genes across the two species. Orthofinder was  
134 run with default settings, taking the transdecoder predicted CDS of both *P. cultripes* and *S. couchii*  
135 as the input, as well as the proteome of *X. tropicalis* (JGI 4.2) to provide context (as an ‘outgroup’).

136

## 137 **Results and Discussion**

138

### 139 ***Transcriptome comparison and quality assessment***

140 The twelve *P. cultripes* samples consisted of 30.5-43.3 million, 101bp paired-end reads (888.3  
141 million reads in total) pooling to 84.2 million post-normalization pair-end reads used for the

142 assembly (10.5% of total). Trinity generated 753,223 transcript contigs with median length 362, of  
143 which 428 406 clustered into ‘genes’ (transcript clusters with shared sequence content; Table 1).  
144 Bowtie2 mapped 83.96% of the reads back onto the transcriptome (Supporting Data 1). In  
145 comparison, the *S. couchii* samples consisted of 32.1-53.9 million, 101bp reads (958.8 million reads  
146 in total) with 84.4 million post-normalization pair-end reads used in for the final assembly (9.19%).  
147 657,280 transcripts were generated by Trinity with a median length of 432bp clustering into 381,135  
148 ‘genes’ (Table 1). Bowtie2 mapped 90.71% of the reads back onto the transcriptome.

149 The BUSCO results support near-complete gene sequence information for 89.7% of genes in  
150 the *P. cultripes* transcriptome with only 7.4% of the genes being fragmented and 2.9% missing. The  
151 quality of the *S. couchii* assembly was similar with 86.6% complete sequence information, 10.5%  
152 fragmented genes and 2.9% missing (Supporting Data 2).

153

154 Querying the Trinity assembly against both the Swissprot database and the *X. tropicalis* proteome  
155 (using blastx) revealed large numbers of fully reconstructed coding transcripts, with 13,645  
156 Swissprot proteins and 12,715 *X. tropicalis* proteins represented by nearly full-length transcripts  
157 (>80% alignment coverage) in the *P. cultripes* assembly, and 14,429 Swissprot proteins and 12,216  
158 *X. tropicalis* proteins in the *S. couchii* assembly (Figure 1; Supporting Data 3).

159

### 160 ***Functional annotation***

161 Gene annotation via the Trinotate pipeline is useful for providing biological context to the assembled  
162 transcriptomes (Trinotate tables available as Supporting Data 4). Querying (using blastx) the  
163 SwissProt database with the trinity assembly allowed for the annotation of 162,031 *P. cultripes* and  
164 204,646 *S. couchii* transcripts. Gene Ontology (GO) derived from these hits resulted in 18,585  
165 unique (out of a total of 1,626,015) GO annotations for *P. cultripes* and 19,917 unique (out of a total  
166 2,155,849) GO annotations for *S. couchii*. The most abundant GO terms per ontology (based on

167 number of corresponding Trinity ‘genes’) for both species were largely comparable for cellular  
168 components (CC) and molecular function (MF) ontologies, but different for biological processes  
169 (BP), with genes related to DNA recombination, RNA mediated transposition and DNA integration  
170 being abundant in *P. cultripes* and notably less so (not in the top ten most abundant genes) in *S.*  
171 *couchii* (Figure 2).

172  
173 The PANTHER GO-slim classification system designed for *Xenopus tropicalis* provides a curated,  
174 functional classification scheme of GO terms and allows for relative over or underrepresentation of  
175 terms to be assessed in relation to the reference (in this case *X. tropicalis*) database. For 17,488  
176 unique *X. tropicalis* genes recovered for *P. cultripes* and 17,717 for *S. couchii*, 13,658 and 13,622  
177 could be mapped to PANTHER genes respectively. The majority of PANTHER terms are  
178 overrepresented in both species in comparison to the *X. tropicalis* reference, including the most  
179 extensively represented GO terms for each of the three ontologies (Figure 3). These are comparable  
180 across the two species (Figure 3) with most of the transcriptomes being related to cell parts and  
181 organelles (cellular components; CC), binding and catalytic activity (molecular function; MF) and  
182 cellular and metabolic processes (biological processes; BP). Genes related to receptor and transporter  
183 activity (MF) are underrepresented in both transcriptomes, as are genes relevant for biological  
184 regulation (BP) in *P. cultripes* and response to stimulus (BP) in *S. couchii*. Barcharts showing over  
185 and underrepresentations of each PANTHER term per species per ontology are provided as  
186 supporting data (Supporting Data 5).

187  
188 TransDecoder recovered fewer candidate coding regions for *P. cultripes* (154,906) than for *S.*  
189 *couchii* (175,331; Table 2). This corresponds to 36.2% and 46.1% of the Trinity-identified ‘genes’  
190 for *P. cultripes* and *S. couchii* respectively. Homology searches using blastp against the entire  
191 Swissprot database was able to annotate 108,881 and 132,578 of these, and 107,199 and 130,847



192 when searching the vertebrates-only database (Table 2). Of the sequences with vertebrate gene hits,  
193 24,327 and 27,309 unique vertebrate swissprot proteins were identified for *P. cultripes* and *S.*  
194 *couchii* (genes with unique UniProtKB-IDs). Of these, the two species share 56.5% (18,651  
195 proteins), with 17.2% being unique to *P. cultripes* (5,676 proteins) and 26.2% unique to *S. couchii*  
196 (8,658 proteins). Similarly, the number of hits of candidate coding regions against other databases  
197 including pfam, signalP, tmHMM, KEGG and EggNOG was greater for *S. couchii* than *P. cultripes*  
198 (Table 2).

199

### 200 ***Orthologous genes***

201 OrthoFinder assigned 183,893 transdecoder-predicted CDS (52.1% of total, from hereon ‘genes’) to  
202 27,111 orthogroups. Almost all of the *X. tropicalis* genes could be assigned to orthogroups (96.5%),  
203 compared to 53.6% of *P. cultripes* genes and 45.7% of *S. couchii* genes (Figure 4a). This could  
204 suggest that our transcriptomes represent large numbers of interesting genes not yet represented in  
205 the *X. tropicalis* transcriptome, but it is important to note that OrthoFinder may be sensitive to the  
206 large number of fragments in *de novo* transcriptome assemblies (compared to its designed use for  
207 genome assemblies) and to the number of species included in the analysis.

208 Of the assigned genes, only small fractions of genes were in species-specific orthogroups (*X.*  
209 *tropicalis*: 0.6%, *P. cultripes*: 2.1%, *S. couchii* 1.8%; Figure 4a). Fifty percent of all genes were in  
210 orthogroups with two or more genes (G50 was 2) and were contained in the largest 23,404  
211 orthogroups (O50 was 23 404). There were 13,138 orthogroups with all species present (Figure 4b)  
212 and 1,345 of these consisted entirely of single-copy genes. *Pelobates cultripes* and *S. couchii* shared  
213 substantially more orthogroups than either did with *X. tropicalis* and with 12,734 orthogroups being  
214 unique to these two species and therefore potentially important additions to the knowledge base of  
215 amphibian transcriptomics.

216

## 217 **Conclusion**

218 *De novo* transcriptome assemblies of the larval phase of two amphibians with vastly differing  
219 environmental sensitivity in developmental rate are presented and annotated. Despite having  
220 drastically different sized genomes (with that of *Pelobates cultripes* being 2.6 times larger than that  
221 of *Scaphiopus couchii*; Liedtke et al. *in press*), the assemblies are of similar sizes (0.58Gbp vs.  
222 0.64Gbp). The assemblies are of high quality, with ~94% of raw reads mapping onto the  
223 transcriptomes, and both transcriptome assemblies consist of >86% full length BUSCO matches with  
224 only 2.9% of the assemblies having no corresponding match.

225 The PANTHER results suggest the two transcriptomes are largely comparable in their  
226 annotations and how they differ from *X. tropicalis*, but the overrepresentation test did not identify  
227 unexpected species-specific differences. For example, the analysis revealed that genes related to  
228 response to stimulus are under-represented in *S. couchii*, this is particularly true for the subcategory  
229 ‘response to abiotic stimulus’ (GO:0009628), which may reflect the fact that the development of *P.*  
230 *cultripes* is known to be more environmentally sensitive [3].

231 Approximately 40% of the assemblies were predicted to be protein coding sequences  
232 allowing for extensive annotation and here we provide information on SwissProt proteins (and their  
233 GO terms), protein family proteins (Pfam; and their GO terms), protein orthologous groups  
234 (egglog), biological pathways (KEGG database), signal peptide cleave sites (SignalP) and  
235 transmembrane protein predictions (TMHMM). The number of predicted coding sequences  
236 (CDS=154,906 and 175,331) far exceeds that for published amphibian larvae transcriptomes (*R.*  
237 *catesbeiana*: 51,720 CDS (15% of assembly) [15], *M. fissipes* 51,506 CDS (46.8% of assembly)  
238 [14], *R. marina* 62,365 CDS [13]) with substantial spadefoot toad-specific clusters of orthologous  
239 genes. The herein provided transcriptomes should therefore serve as an important resource for the  
240 advancement in the understanding of amphibian larval transcriptomics.

241

242 **Data and materials**

243 The data sets supporting the results of this article are available in the associated repository GigaDB  
244 repository [[<accession numbers to be released>](#)]. Specifically, we provide Quality assessment results  
245 of both BUSCO and BowTie2, Transcriptome annotations including Trinotate summary tables,  
246 Panther annotations and transdecoder.pep sequence files. In addition, all raw reads as well as the  
247 transcriptome assemblies are deposited on the NCBI's Sequence Read Archive [SRA; SRP161446]  
248 and Transcriptome Shotgun Assembly database [TSA; [<accession numbers to be released>](#)], under  
249 BioProject [PRJNA490256].

250

251 **Acknowledgements**

252 This project was funded by Ministerio de Economía, Industria y Competitividad (MINECO) through  
253 the grant CGL2014-59206-P awarded to IGM. The CNAG team was funded by grant  
254 PT17/0009/0019 from MINECO, as well as Fondo Europeo de Desarrollo Regional (FEDER).

255

256 **References**

257 1. Moran NA. Adaptation and constraint in the complex life cycles of animals. *Annu. Rev. Ecol.*  
258 *Syst. Annual Reviews* 4139 El Camino Way, PO Box 10139, Palo Alto, CA 94303-0139, USA;  
259 1994;25:573–600.

260 2. Buchholz DR, Hayes TB. Evolutionary Patterns of Diversity in Spadefoot Toad Metamorphosis  
261 (Anura: Pelobatidae). Gatten RE Jr, editor. *Copeia*. 2002;2002:180–9.

262 3. Kulkarni SS, Denver RJ, Gomez-Mestre I, Buchholz DR. Genetic accommodation via modified  
263 endocrine signalling explains phenotypic divergence among spadefoot toad species. *Nat.*  
264 *Communications*. Springer US; 2017;8:1–6.

265 4. Gomez-Mestre I, Kulkarni S, Buchholz DR. Mechanisms and consequences of developmental

- 266 acceleration in tadpoles responding to pond drying. Navas CA, editor. 2013;8:e84266.
- 267 5. Gomez-Mestre I, Sacoccio VL, Iijima T, Collins EM, Rosenthal GG, Warkentin KM. The shape  
268 of things to come: linking developmental plasticity to post-metamorphic morphology in anurans. *J.*  
269 *Evolution. Biol.* 2010;23:1364–73.
- 270 6. Kulkarni SS, Gomez-Mestre I, Moskalik CL, Storz BL, Buchholz DR. Evolutionary reduction of  
271 developmental plasticity in desert spadefoot toads. *J. Evolution. Biol.* 2011;24:2445–55.
- 272 7. Johansson F, Richter-Boix A. Within-Population Developmental and Morphological Plasticity is  
273 Mirrored in Between-Population Differences: Linking Plasticity and Diversity. *Evol Biol.*  
274 2013;40:494–503.
- 275 8. Denver RJ. Stress hormones mediate environment-genotype interactions during amphibian  
276 development. *Gen. Comp. Endocr.* 2009;164:20–31.
- 277 9. Wyngaard GA, Rasch EM, Manning NM, Gasser K, Domangue R. The relationship between  
278 genome size, development rate, and body size in copepods. *Hydrobiologia.* Kluwer Academic  
279 Publishers; 2005;532:123–37.
- 280 10. Alfsnes K, Leinaas HP, Hessen DO. Genome size in arthropods; different roles of phylogeny,  
281 habitat and life history in insects and crustaceans. *Ecol. Evol.* 2017;44:498–9.
- 282 11. Jockusch EL. An evolutionary correlate of genome size change in plethodontid salamanders. *P.*  
283 *Roy. Soc. B-Biol. Sci.* 1997;264:597–604.
- 284 12. Zeng C, Gomez-Mestre I, Wiens JJ. Evolution of rapid development in Spadefoot Toads is  
285 unrelated to arid environments. Escrivá H, editor. *PLoS ONE. Life Sci. Adv.* 2014;9:e96637.
- 286 13. Richardson MF, Sequeira F, Selechnik D, Carneiro M, Vallinoto M, Reid JG, et al. Improving

- 287 amphibian genomic resources: a multitissue reference transcriptome of an iconic invader.  
288 GigaScience. 2018;7:1–7.
- 289 14. Zhao L, Liu L, Wang S, Wang H, Jiang J. Transcriptome profiles of metamorphosis in the  
290 ornamented pygmy frog *Microhyla fissipes* clarify the functions of thyroid hormone receptors in  
291 metamorphosis. Sci. Rep. Nature Publishing Group; 2016;6:1–11.
- 292 15. Birol I, Behsaz B, Hammond SA, Kucuk E, Veldhoen N, Helbing CC. De novo Transcriptome  
293 Assemblies of *Rana (Lithobates) catesbeiana* and *Xenopus laevis* Tadpole Livers for Comparative  
294 Genomics without Reference Genomes. Plateroti M, editor. PLoS ONE. 2015;10:e0130720–18.
- 295 16. Gosner KL. A Simplified Table for Staging Anuran Embryos and Larvae with Notes on  
296 Identification. Herpetologica. 1960;16:183–90.
- 297 17. Ewels P, Magnusson M, Lundin S, Källner M. MultiQC: summarize analysis results for multiple  
298 tools and samples in a single report. Bioinformatics. 2016;32:3047–8.
- 299 18. Haas BJ, Papanicolaou A, Yassour M, Grabherr M, Blood PD, Bowden J, et al. De novo  
300 transcript sequence reconstruction from RNA-seq using the Trinity platform for reference generation  
301 and analysis. Nat Protoc. 2013;8:1494–512.
- 302 19. Bolger AM, Lohse M, Usadel B. Trimmomatic: a flexible trimmer for Illumina sequence data.  
303 Bioinformatics. 2014;30:2114–20.
- 304 20. Langmead B, Salzberg SL. Fast gapped-read alignment with Bowtie 2. Nat. Methods.  
305 2012;9:357–9.
- 306 21. Simaõ FA, Waterhouse RM, Panagiotis I, Kriventseva EV. BUSCO: assessing genome assembly  
307 and annotation completeness with single-copy orthologs. Bioinformatics. 2015;31:3210–2.

- 308 22. The UniProt Consortium. UniProt: the universal protein knowledgebase. *Nucleic Acids Res.*  
309 2017;45:D158–69.
- 310 23. Finn RD, Coghill P, Eberhardt RY, Eddy SR, Mistry J, Mitchell AL, et al. The Pfam protein  
311 families database: towards a more sustainable future. *Nucleic Acids Res.* 2016;44:D279–85.
- 312 24. Petersen TN, Brunak S, Heijne von G, Nielsen H. SignalP 4.0: discriminating signal peptides  
313 from transmembrane regions. Nature Publishing Group. *Nature Publishing Group*; 2011;8:785–6.
- 314 25. Huerta-Cepas J, Szklarczyk D, Forslund K, Cook H, Heller D, Walter MC, et al. eggNOG 4.5: a  
315 hierarchical orthology framework with improved functional annotations for eukaryotic, prokaryotic  
316 and viral sequences. *Nucleic Acids Res.* 2016;44:D286–93.
- 317 26. Mi H, Muruganujan A, Casagrande JT, Thomas PD. Large-scale gene function analysis with the  
318 PANTHER classification system. *Nat Protoc.* 2013;8:1551–66.
- 319 27. Emms DM, Kelly S. OrthoFinder: solving fundamental biases in whole genome comparisons  
320 dramatically improves orthogroup inference accuracy. *Genome Biol. Genome Biology*; 2015;16:1–  
321 14.
- 322

322

323 **Tables**

324

325 Table 1: Transcriptome assembly statistics for both tadpole species. Summaries for Trinity outputs  
 326 are given both at the transcript and at the ‘gene’ level.

|                                                  | <i>P. cultripipes</i>         | <i>S. couchii</i>             |
|--------------------------------------------------|-------------------------------|-------------------------------|
| Total number of raw reads                        | 888,265,444                   | 958,782,922                   |
| Number of <i>in silico</i> normalized reads      | 84,209,684                    | 84,420,786                    |
| Number of read pairs aligned to assembly         | 419,274,288 (94.4%)           | 453,683,501 (94.6%)           |
| Number of proper pair reads aligned to assembly  | 359,039,281 (85.6%)           | 425,833,848 (93.9%)           |
| N50 of transcripts   longest isoform per ‘gene’  | 1,496bp   731bp               | 2,057bp   872bp               |
| Number of Trinity transcripts   ‘genes’          | 753,223   428,406             | 657,280   381,135             |
| Size of transcript   longest isoform per ‘gene’: |                               |                               |
| <i>Total</i>                                     | 581,464,720bp   237,111,496bp | 644,907,581bp   232,600,864bp |
| <i>Median</i>                                    | 362bp   313bp                 | 432bp   331bp                 |
| <i>Average</i>                                   | 771.97bp   553.47bp           | 981.18bp   610.28bp           |

327

328

329 Table 2: Number of unique | total TransDecoder-predicted candidate genes with annotations via  
 330 different search tools and databases (summary of Trinotate results).

|                                                    | <i>P. cultripipes</i> | <i>S. couchii</i> |
|----------------------------------------------------|-----------------------|-------------------|
| TransDecoder predicted coding regions (ORFs)       | 154 906               | 175 331           |
| Protein hits (blastp - SwissProt)                  | 79 504   108 881      | 91 337   132 578  |
| Protein hits (blastp – SwissProt vertebrates only) | 77 924   107 199      | 89 704   130 847  |
| pfam hits (HMMER search)                           | 65 597   91 929       | 76 741   112 740  |
| signalP predicted peptides                         | 3 943   10 981        | 4 114   13 097    |
| tmHMM predicted transmembrane proteins             | 17 990   25 833       | 19 881   29 991   |
| GO Pfam                                            | 2 471   57 308        | 2 583   71 966    |
| KEGG                                               | 31 313   127 707      | 40 765   174 712  |
| EggNOG                                             | 8 125   117 983       | 8 681   156 494   |

331

331

332 **Figure Legends**

333

334 Figure 1: Number of transcripts (using grouped highest scoring segment pairs) per alignment  
335 coverage bins when querying against the SwissProt and *Xenopus tropicalis* proteome sequence  
336 databases.

337

338 Figure 2. Wordclouds of the 50 most abundant GO terms per ontology per species. Size and colour  
339 (large to small, dark to light) is relative to the number of Trinity ‘genes’ that are associated with each  
340 GO term.

341

342 Figure 3. PANTHER functional classification of transcriptomes. Wedge size reflect number of  
343 unique genes per category and +/- annotations specify significant over/under representation of the  
344 GO-slim term compared to the *X. tropicalis* reference database.

345

346 Figure 4. Orthofinder results showing a) the percentage of genes that could be assigned to  
347 orthogroups per species (darker shading represents percentage of genes in species-specific  
348 orthogroups) and b) the number of species-specific and shared orthogroups recovered.

349



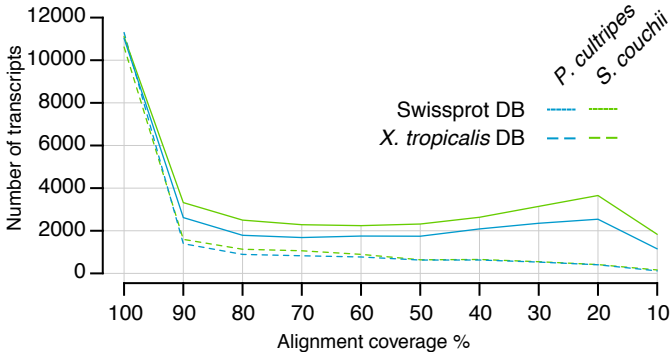



**P. cultripes****S. couchii**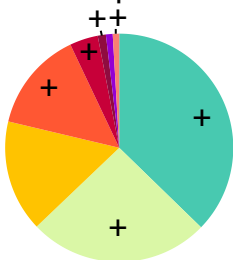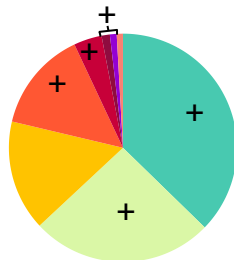**Cellular Components**

- cell part (GO:0044464)
- organelle (GO:0043226)
- membrane (GO:0016020)
- macromolecular complex (GO:0032991)
- extracellular region (GO:0005576)
- extracellular matrix (GO:0031012)
- synapse (GO:0045202)
- cell junction (GO:0030054)

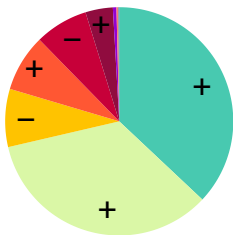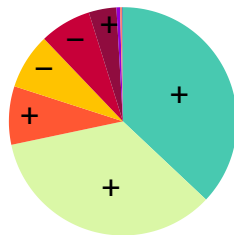**Molecular Function**

- binding (GO:0005488)
- catalytic activity (GO:0003824)
- receptor activity (GO:0004872)
- transporter activity (GO:0005215)
- signal transducer activity (GO:0004871)
- structural molecule activity (GO:0005198)
- translation regulator activity (GO:0045182)
- antioxidant activity (GO:0016209)
- channel regulator activity (GO:0016247)

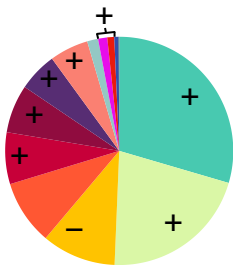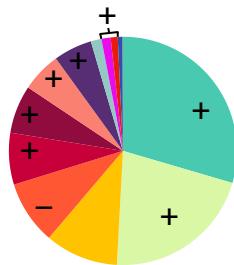**Biological Process**

- cellular process (GO:0009987)
- metabolic process (GO:0008152)
- biological regulation (GO:0065007)
- response to stimulus (GO:0050896)
- cellular component organization or biogenesis (GO:0071840)
- localization (GO:0051179)
- multicellular organismal process (GO:0032501)
- developmental process (GO:0032502)
- immune system process (GO:0002376)
- biological adhesion (GO:0022610)
- locomotion (GO:0040011)
- reproduction (GO:0000003)
- rhythmic process (GO:0048511)
- growth (GO:0040007)

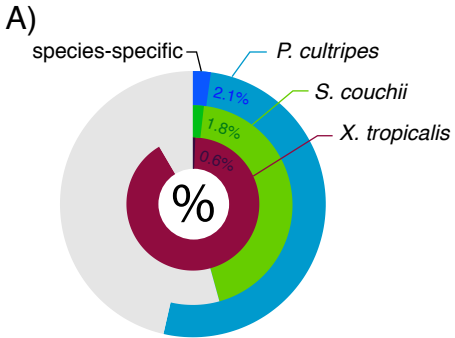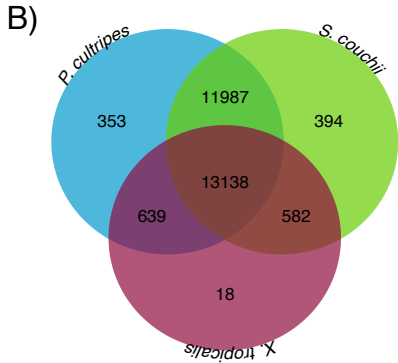

Source: https://www.biorxiv.org/content/10.1101/421446v1.full.pdf
